# Supplementary material for: Parasitic infection in the scyphozoan Rhizostoma pulmo (Macri, 1778)
Source: Springer Nature journal article supplement (doi:10.1038/s41598-023-31693-7), 2023-04-05
Supplement: MOESM1 [file 41598_2023_31693_MOESM1_ESM.pdf]

**Supplementary information.**

**Parasitic infections in mediterranean scyphomedusae: the case of *Rhizostoma pulmo* (Macri, 1778) from the Gulf of Trieste**

Gregorio Motta <sup>1,2,4</sup>, Monica Caffara <sup>3</sup>, Maria Letizia Fioravanti <sup>3</sup>, Massimiliano Bottaro <sup>2</sup>, Massimo Avian <sup>1</sup>, Antonio Terlizzi <sup>1,2</sup>, Perla Tedesco <sup>3,4,\*</sup>

## Supplementary Table S1 R summaries for LMs

### Model specifications

**Model formula** (using R notation): the `lm` function from the `stats` (version 3.6.2) was used to develop the models.

*lm(Intensity in entire body ~ log(Diameter), data = Model)*

*Residuals:*

| <i>Min</i> | <i>1Q</i> | <i>Median</i> | <i>3Q</i> | <i>Max</i> |
|------------|-----------|---------------|-----------|------------|
| -146.449   | -41.091   | 5.517         | 38.241    | 147.091    |

*Coefficients:*

|                      | <i>Estimate</i> | <i>Std. Error</i> | <i>t value</i> | <i>Pr(&gt; t )</i> |     |
|----------------------|-----------------|-------------------|----------------|--------------------|-----|
| <i>(Intercept)</i>   | -86.66          | 17.95             | -4.827         | 1.11e-05           | *** |
| <i>log(Diameter)</i> | 202.48          | 10.73             | 18.863         | < 2e-16            | *** |

---

*Signif. codes: 0 '\*\*\*' 0.001 '\*\*' 0.01 '\*' 0.05 '.' 0.1 ' ' 1*

*Residual standard error: 62.33 on 56 degrees of freedom*

*Multiple R-squared: 0.864, Adjusted R-squared: 0.8616*

*F-statistic: 355.8 on 1 and 56 DF, p-value: < 2.2e-16*

**Graphical diagnostic:** Distribution of model residuals over the fitted model values: a random distribution is observed indicating no systematic error in model estimated coefficients.

## Model specifications

**Model formula** (using R notation): the `lm` function from the stats (version 3.6.2) was used to develop the models.

*lm(Intensity in entire manubrium ~ log(Diameter), data = Model)*

*Residuals:*

| <i>Min</i> | <i>1Q</i> | <i>Median</i> | <i>3Q</i> | <i>Max</i> |
|------------|-----------|---------------|-----------|------------|
| -71.936    | -27.283   | -0.561        | 21.281    | 125.955    |

*Coefficients:*

|                      | <i>Estimate</i> | <i>Std. Error</i> | <i>t value</i> | <i>Pr(&gt; t )</i> |
|----------------------|-----------------|-------------------|----------------|--------------------|
| <i>(Intercept)</i>   | -35.947         | 10.777            | -3.336         | 0.00152 **         |
| <i>log(Diameter)</i> | 97.187          | 6.443             | 15.085         | < 2e-16 ***        |

---

*Signif. codes: 0 '\*\*\*' 0.001 '\*\*' 0.01 '\*' 0.05 '.' 0.1 ' ' 1*

*Residual standard error: 37.41 on 56 degrees of freedom*

*Multiple R-squared: 0.8025, Adjusted R-squared: 0.799*

*F-statistic: 227.5 on 1 and 56 DF, p-value: < 2.2e-16*

**Graphical diagnostic:** Distribution of model residuals over the fitted model values: a random distribution is observed indicating no systematic error in model estimated coefficients.

## Model specifications

**Model formula** (using R notation): the `lm` function from the stats (version 3.6.2) was used to develop the models.

*lm(Intensity in umbrella ~ log(Diameter), data = Model)*

*Residuals:*

| <i>Min</i> | <i>1Q</i> | <i>Median</i> | <i>3Q</i> | <i>Max</i> |
|------------|-----------|---------------|-----------|------------|
| -89.48     | -23.79    | -1.36         | 21.38     | 139.15     |

*Coefficients:*

|                      | <i>Estimate</i> | <i>Std. Error</i> | <i>t value</i> | <i>Pr(&gt; t )</i> |     |
|----------------------|-----------------|-------------------|----------------|--------------------|-----|
| <i>(Intercept)</i>   | -50.818         | 10.751            | -4.727         | 1.58e-05           | *** |
| <i>log(Diameter)</i> | 105.288         | 6.428             | 16.380         | < 2e-16            | *** |

---

*Signif. codes: 0 '\*\*\*' 0.001 '\*\*' 0.01 '\*' 0.05 '.' 0.1 ' ' 1*

*Residual standard error: 37.33 on 56 degrees of freedom*

*Multiple R-squared: 0.8273, Adjusted R-squared: 0.8242*

*F-statistic: 268.3 on 1 and 56 DF, p-value: < 2.2e-16*

**Graphical diagnostic:** Distribution of model residuals over the fitted model values: a random distribution is observed indicating no systematic error in model estimated coefficients.

## Model specifications

**Model formula** (using R notation): the `lm` function from the stats (version 3.6.2) was used to develop the models.

*lm(Intensity in scapulae ~ log(Diameter), data = Model)*

*Residuals:*

| <i>Min</i> | <i>1Q</i> | <i>Median</i> | <i>3Q</i> | <i>Max</i> |
|------------|-----------|---------------|-----------|------------|
| -53.753    | -12.269   | -3.779        | 14.357    | 71.133     |

*Coefficients:*

|                      | <i>Estimate</i> | <i>Std. Error</i> | <i>t value</i> | <i>Pr(&gt; t )</i> |
|----------------------|-----------------|-------------------|----------------|--------------------|
| <i>(Intercept)</i>   | -6.628          | 7.145             | -0.928         | 0.358              |
| <i>log(Diameter)</i> | 49.189          | 4.271             | 11.516         | <2e-16 ***         |

---

*Signif. codes: 0 '\*\*\*' 0.001 '\*\*' 0.01 '\*' 0.05 '.' 0.1 ' ' 1*

*Residual standard error: 24.8 on 56 degrees of freedom*

*Multiple R-squared: 0.7031, Adjusted R-squared: 0.6978*

*F-statistic: 132.6 on 1 and 56 DF, p-value: < 2.2e-16*

**Graphical diagnostic:** Distribution of model residuals over the fitted model values: a random distribution is observed indicating no systematic error in model estimated coefficients.

## Model specifications

**Model formula** (using R notation): the `lm` function from the stats (version 3.6.2) was used to develop the models.

*lm(Intensity in oral arms ~ log(Diameter), data = Model)*

*Residuals:*

| <i>Min</i> | <i>1Q</i> | <i>Median</i> | <i>3Q</i> | <i>Max</i> |
|------------|-----------|---------------|-----------|------------|
| -36.521    | -12.011   | -2.406        | 8.530     | 54.822     |

*Coefficients:*

|                      | <i>Estimate</i> | <i>Std. Error</i> | <i>t value</i> | <i>Pr(&gt; t )</i> |
|----------------------|-----------------|-------------------|----------------|--------------------|
| <i>(Intercept)</i>   | -29.319         | 5.492             | -5.339         | 1.76e-06 ***       |
| <i>log(Diameter)</i> | 47.998          | 3.283             | 14.619         | < 2e-16 ***        |

---

*Signif. codes: 0 '\*\*\*' 0.001 '\*\*' 0.01 '\*' 0.05 '.' 0.1 ' ' 1*

*Residual standard error: 19.07 on 56 degrees of freedom*

*Multiple R-squared: 0.7924, Adjusted R-squared: 0.7887*

*F-statistic: 213.7 on 1 and 56 DF, p-value: < 2.2e-16*

**Graphical diagnostic:** Distribution of model residuals over the fitted model values: a random distribution is observed indicating no systematic error in model estimated coefficients.

To investigate statistical differences in intensity in the different body compartments, two one-way PERMANOVA on the dataset was performed (Table S2, S3). Euclidean distances were calculated among intensities. The test was performed using 9999 permutations. When significant, a posteriori pair-wise comparisons were performed among compartments via PERMANOVA t statistic with 9999 permutations (Table S4).

**Supplementary Table S2.** PERMANOVA: Umbrella vs Whole manubrium

| PERMANOVA table of results |     |            |        |          |         |       |
|----------------------------|-----|------------|--------|----------|---------|-------|
| Source                     | df  | SS         | MS     | Pseudo-F | p-Value | Perms |
| Comp                       | 1   | 229.04     | 229.04 | 0.030766 | 0.864   | 1189  |
| Res                        | 114 | 8.4871E+05 | 7444.8 |          |         |       |
| Total                      | 115 | 8.4894E+05 |        |          |         |       |

**Supplementary Table S3.** PERMANOVA: Umbrella vs Scapulae vs Oral arms

| PERMANOVA table of results |     |          |        |          |         |       |
|----------------------------|-----|----------|--------|----------|---------|-------|
| Source                     | df  | SS       | MS     | Pseudo-F | p-Value | Perms |
| Comp                       | 2   | 1.20E+05 | 60076  | 15.42    | 0.0001  | 9663  |
| Res                        | 171 | 6.65E+05 | 3894.2 |          |         |       |
| Total                      | 173 | 7.86E+05 |        |          |         |       |

**Supplementary Table S4.** PERMANOVA: Umbrella vs Scapulae vs Oral arms Pairwise Comparison

| Pair-Wise Tests     |      |         |       |
|---------------------|------|---------|-------|
| Groups              | t    | p-Value | Perms |
| Umbrella, Scapulae  | 3.00 | 0.0029  | 1030  |
| Umbrella, Oral arms | 4.94 | 0.0001  | 1081  |
| Scapulae, Oral arms | 3.04 | 0.0036  | 679   |

To investigate statistical differences in relative abundance in the different body compartments at different body size, a two-way PERMANOVA on the dataset was performed (Table S5). Euclidean distances were calculated. The test was performed using 9999 permutations. When significant, a posteriori pair-wise comparisons were performed via PERMANOVA t statistic with 9999 permutations (Table S6).

**Supplementary Table S5** PERMANOVA: Relative abundance - RangeDiam x Body compartment

| PERMANOVA table of results |     |         |          |            |         |       |
|----------------------------|-----|---------|----------|------------|---------|-------|
| Source                     | df  | SS      | MS       | Pseudo-F   | p-Value | Perms |
| RangeDiam                  | 7   | 0.26289 | 0.037555 | 0.00039378 | 1       | 9945  |
| Comp                       | 2   | 25719   | 12860    | 134.84     | 0.0001  | 9962  |
| RaxCo                      | 14  | 12108   | 864.84   | 9.0682     | 0.0001  | 9915  |
| Res                        | 150 | 14306   | 95.37    |            |         |       |
| Total                      | 173 | 65274   |          |            |         |       |

**Supplementary Table S6** PERMANOVA: Relative abundance - RangeDiam x Body compartment.  
Pairwise Comparison

*Resemblance worksheet*

Number of permutations: 9999

*Factors*

Name Levels  
Range Diameter (cm) – Body Compartment 24

| Groups                        | t       | P(perm) | Unique perms |
|-------------------------------|---------|---------|--------------|
| 1-2 Umbrella, 2-4 Umbrella    | 3.5165  | 0.0022  | 9797         |
| 1-2 Umbrella, 4-6 Umbrella    | 2.6407  | 0.0182  | 9313         |
| 1-2 Umbrella, 6-8 Umbrella    | 2.0255  | 0.062   | 5647         |
| 1-2 Umbrella, 8-10 Umbrella   | 0.90266 | 0.3895  | 1000         |
| 1-2 Umbrella, 10-12 Umbrella  | 1.2382  | 0.24    | 1000         |
| 1-2 Umbrella, 12-14 Umbrella  | 1.1737  | 0.2669  | 2887         |
| 1-2 Umbrella, 14-16 Umbrella  | 0.76615 | 0.4399  | 286          |
| 1-2 Umbrella, 1-2 Scapulae    | 3.0825  | 0.0072  | 4208         |
| 1-2 Umbrella, 2-4 Scapulae    | 2.6734  | 0.0133  | 9820         |
| 1-2 Umbrella, 4-6 Scapulae    | 3.8096  | 0.0016  | 9313         |
| 1-2 Umbrella, 6-8 Scapulae    | 3.3555  | 0.0075  | 5666         |
| 1-2 Umbrella, 8-10 Scapulae   | 3.5576  | 0.0056  | 999          |
| 1-2 Umbrella, 10-12 Scapulae  | 3.353   | 0.0089  | 991          |
| 1-2 Umbrella, 12-14 Scapulae  | 3.8786  | 0.0029  | 2892         |
| 1-2 Umbrella, 14-16 Scapulae  | 3.1129  | 0.0151  | 285          |
| 1-2 Umbrella, 1-2 Oral arms   | 9.1669  | 0.0001  | 981          |
| 1-2 Umbrella, 2-4 Oral arms   | 10.099  | 0.0001  | 9784         |
| 1-2 Umbrella, 4-6 Oral arms   | 6.0837  | 0.0001  | 9304         |
| 1-2 Umbrella, 6-8 Oral arms   | 4.7326  | 0.0007  | 5683         |
| 1-2 Umbrella, 8-10 Oral arms  | 3.8209  | 0.0029  | 1000         |
| 1-2 Umbrella, 10-12 Oral arms | 3.7275  | 0.003   | 998          |
| 1-2 Umbrella, 12-14 Oral arms | 4.2077  | 0.0021  | 2872         |



|                               |         |        |      |
|-------------------------------|---------|--------|------|
| 1-2 Umbrella, 14-16 Oral arms | 3.2074  | 0.0098 | 284  |
| 2-4 Umbrella, 4-6 Umbrella    | 0.53592 | 0.6032 | 9823 |
| 2-4 Umbrella, 6-8 Umbrella    | 0.65908 | 0.5193 | 9321 |
| 2-4 Umbrella, 8-10 Umbrella   | 2.1307  | 0.0459 | 4774 |
| 2-4 Umbrella, 10-12 Umbrella  | 1.4726  | 0.1455 | 4733 |
| 2-4 Umbrella, 12-14 Umbrella  | 1.9538  | 0.0699 | 8116 |
| 2-4 Umbrella, 14-16 Umbrella  | 1.8123  | 0.0842 | 1122 |
| 2-4 Umbrella, 1-2 Scapulae    | 1.2999  | 0.2144 | 9762 |
| 2-4 Umbrella, 2-4 Scapulae    | 1.7356  | 0.091  | 9840 |
| 2-4 Umbrella, 4-6 Scapulae    | 1.7624  | 0.0891 | 9825 |
| 2-4 Umbrella, 6-8 Scapulae    | 1.9851  | 0.0611 | 9338 |
| 2-4 Umbrella, 8-10 Scapulae   | 3.3534  | 0.0026 | 4674 |
| 2-4 Umbrella, 10-12 Scapulae  | 2.9317  | 0.0089 | 4747 |
| 2-4 Umbrella, 12-14 Scapulae  | 3.5111  | 0.0024 | 8136 |
| 2-4 Umbrella, 14-16 Scapulae  | 2.9973  | 0.009  | 1122 |
| 2-4 Umbrella, 1-2 Oral arms   | 12.36   | 0.0001 | 9292 |
| 2-4 Umbrella, 2-4 Oral arms   | 11.78   | 0.0001 | 9834 |
| 2-4 Umbrella, 4-6 Oral arms   | 6.3345  | 0.0001 | 9788 |
| 2-4 Umbrella, 6-8 Oral arms   | 4.7829  | 0.0002 | 9332 |
| 2-4 Umbrella, 8-10 Oral arms  | 3.9043  | 0.0009 | 4741 |
| 2-4 Umbrella, 10-12 Oral arms | 3.7115  | 0.0008 | 4691 |
| 2-4 Umbrella, 12-14 Oral arms | 4.1785  | 0.0004 | 8072 |
| 2-4 Umbrella, 14-16 Oral arms | 3.2048  | 0.0045 | 1123 |
| 4-6 Umbrella, 6-8 Umbrella    | 0.32987 | 0.7325 | 4250 |
| 4-6 Umbrella, 8-10 Umbrella   | 3.0484  | 0.012  | 715  |
| 4-6 Umbrella, 10-12 Umbrella  | 2.0523  | 0.0488 | 714  |
| 4-6 Umbrella, 12-14 Umbrella  | 2.3301  | 0.0325 | 1983 |
| 4-6 Umbrella, 14-16 Umbrella  | 2.3606  | 0.0405 | 220  |
| 4-6 Umbrella, 1-2 Scapulae    | 1.3574  | 0.1984 | 9356 |
| 4-6 Umbrella, 2-4 Scapulae    | 1.1541  | 0.2465 | 9828 |
| 4-6 Umbrella, 4-6 Scapulae    | 3.6622  | 0.0022 | 7336 |
| 4-6 Umbrella, 6-8 Scapulae    | 4.055   | 0.0021 | 4242 |
| 4-6 Umbrella, 8-10 Scapulae   | 6.3992  | 0.0017 | 714  |
| 4-6 Umbrella, 10-12 Scapulae  | 6.3215  | 0.0014 | 715  |
| 4-6 Umbrella, 12-14 Scapulae  | 7.1857  | 0.0004 | 1980 |
| 4-6 Umbrella, 14-16 Scapulae  | 5.0933  | 0.0055 | 220  |
| 4-6 Umbrella, 1-2 Oral arms   | 24.391  | 0.0001 | 988  |
| 4-6 Umbrella, 2-4 Oral arms   | 16.177  | 0.0001 | 9784 |
| 4-6 Umbrella, 4-6 Oral arms   | 10.461  | 0.0001 | 7966 |
| 4-6 Umbrella, 6-8 Oral arms   | 7.9305  | 0.0004 | 4280 |
| 4-6 Umbrella, 8-10 Oral arms  | 7.8632  | 0.0014 | 715  |
| 4-6 Umbrella, 10-12 Oral arms | 7.6424  | 0.0018 | 715  |
| 4-6 Umbrella, 12-14 Oral arms | 7.3825  | 0.0005 | 1970 |
| 4-6 Umbrella, 14-16 Oral arms | 6.4559  | 0.006  | 220  |
| 6-8 Umbrella, 8-10 Umbrella   | 2.2239  | 0.0768 | 210  |
| 6-8 Umbrella, 10-12 Umbrella  | 1.3933  | 0.1878 | 210  |
| 6-8 Umbrella, 12-14 Umbrella  | 1.6475  | 0.1336 | 462  |
| 6-8 Umbrella, 14-16 Umbrella  | 1.7025  | 0.1591 | 84   |
| 6-8 Umbrella, 1-2 Scapulae    | 1.2113  | 0.2428 | 5645 |
| 6-8 Umbrella, 2-4 Scapulae    | 0.6902  | 0.4966 | 9329 |
| 6-8 Umbrella, 4-6 Scapulae    | 3.3804  | 0.0044 | 4315 |

|                                 |          |        |      |
|---------------------------------|----------|--------|------|
| 6-8 Umbrella, 6-8 Scapulae      | 3.6414   | 0.0019 | 462  |
| 6-8 Umbrella, 8-10 Scapulae     | 5.4855   | 0.0049 | 210  |
| 6-8 Umbrella, 10-12 Scapulae    | 5.5014   | 0.0051 | 210  |
| 6-8 Umbrella, 12-14 Scapulae    | 6.2371   | 0.0017 | 462  |
| 6-8 Umbrella, 14-16 Scapulae    | 4.2996   | 0.0139 | 84   |
| 6-8 Umbrella, 1-2 Oral arms     | 20.834   | 0.0002 | 125  |
| 6-8 Umbrella, 2-4 Oral arms     | 13.68    | 0.0001 | 9237 |
| 6-8 Umbrella, 4-6 Oral arms     | 8.9434   | 0.0003 | 4292 |
| 6-8 Umbrella, 6-8 Oral arms     | 6.7534   | 0.0016 | 462  |
| 6-8 Umbrella, 8-10 Oral arms    | 6.735    | 0.0051 | 210  |
| 6-8 Umbrella, 10-12 Oral arms   | 6.5689   | 0.005  | 210  |
| 6-8 Umbrella, 12-14 Oral arms   | 6.2991   | 0.0021 | 462  |
| 6-8 Umbrella, 14-16 Oral arms   | 5.5055   | 0.0121 | 84   |
| 8-10 Umbrella, 10-12 Umbrella   | 1.3679   | 0.256  | 35   |
| 8-10 Umbrella, 12-14 Umbrella   | 0.42388  | 0.6378 | 126  |
| 8-10 Umbrella, 14-16 Umbrella   | 0.010627 | 1      | 35   |
| 8-10 Umbrella, 1-2 Scapulae     | 1.777    | 0.1007 | 1001 |
| 8-10 Umbrella, 2-4 Scapulae     | 1.2166   | 0.2471 | 4150 |
| 8-10 Umbrella, 4-6 Scapulae     | 6.6814   | 0.0013 | 715  |
| 8-10 Umbrella, 6-8 Scapulae     | 6.8195   | 0.0058 | 210  |
| 8-10 Umbrella, 8-10 Scapulae    | 8.6752   | 0.0291 | 35   |
| 8-10 Umbrella, 10-12 Scapulae   | 10.933   | 0.0273 | 35   |
| 8-10 Umbrella, 12-14 Scapulae   | 11.07    | 0.0097 | 126  |
| 8-10 Umbrella, 14-16 Scapulae   | 5.9428   | 0.0317 | 35   |
| 8-10 Umbrella, 1-2 Oral arms    | 32.281   | 0.0013 | 31   |
| 8-10 Umbrella, 2-4 Oral arms    | 15.556   | 0.0002 | 4191 |
| 8-10 Umbrella, 4-6 Oral arms    | 11.896   | 0.0019 | 714  |
| 8-10 Umbrella, 6-8 Oral arms    | 9.0895   | 0.0042 | 210  |
| 8-10 Umbrella, 8-10 Oral arms   | 11.449   | 0.0276 | 35   |
| 8-10 Umbrella, 10-12 Oral arms  | 11.707   | 0.0286 | 35   |
| 8-10 Umbrella, 12-14 Oral arms  | 9.0105   | 0.0066 | 126  |
| 8-10 Umbrella, 14-16 Oral arms  | 9.3857   | 0.0278 | 35   |
| 10-12 Umbrella, 12-14 Umbrella  | 0.51125  | 0.7365 | 126  |
| 10-12 Umbrella, 14-16 Umbrella  | 0.86321  | 0.4546 | 35   |
| 10-12 Umbrella, 1-2 Scapulae    | 1.4492   | 0.1742 | 1001 |
| 10-12 Umbrella, 2-4 Scapulae    | 0.44586  | 0.6577 | 4777 |
| 10-12 Umbrella, 4-6 Scapulae    | 6.0362   | 0.0009 | 715  |
| 10-12 Umbrella, 6-8 Scapulae    | 6.6291   | 0.0047 | 210  |
| 10-12 Umbrella, 8-10 Scapulae   | 9.4401   | 0.0277 | 35   |
| 10-12 Umbrella, 10-12 Scapulae  | 16.439   | 0.0295 | 35   |
| 10-12 Umbrella, 12-14 Scapulae  | 13.43    | 0.0094 | 126  |
| 10-12 Umbrella, 14-16 Scapulae  | 5.9068   | 0.0278 | 35   |
| 10-12 Umbrella, 1-2 Oral arms   | 44.201   | 0.001  | 31   |
| 10-12 Umbrella, 2-4 Oral arms   | 15.028   | 0.0002 | 4169 |
| 10-12 Umbrella, 4-6 Oral arms   | 11.814   | 0.0014 | 711  |
| 10-12 Umbrella, 6-8 Oral arms   | 8.997    | 0.0044 | 210  |
| 10-12 Umbrella, 8-10 Oral arms  | 14.557   | 0.0308 | 35   |
| 10-12 Umbrella, 10-12 Oral arms | 15.85    | 0.0297 | 35   |
| 10-12 Umbrella, 12-14 Oral arms | 9.2198   | 0.0068 | 126  |
| 10-12 Umbrella, 14-16 Oral arms | 11.909   | 0.0299 | 35   |
| 12-14 Umbrella, 14-16 Umbrella  | 0.329    | 0.7278 | 56   |

|                                 |         |        |      |
|---------------------------------|---------|--------|------|
| 12-14 Umbrella, 1-2 Scapulae    | 1.788   | 0.0941 | 2897 |
| 12-14 Umbrella, 2-4 Scapulae    | 0.90314 | 0.3704 | 8179 |
| 12-14 Umbrella, 4-6 Scapulae    | 5.3676  | 0.0005 | 1988 |
| 12-14 Umbrella, 6-8 Scapulae    | 5.2954  | 0.0028 | 462  |
| 12-14 Umbrella, 8-10 Scapulae   | 6.6799  | 0.0091 | 126  |
| 12-14 Umbrella, 10-12 Scapulae  | 6.9796  | 0.0081 | 126  |
| 12-14 Umbrella, 12-14 Scapulae  | 7.7768  | 0.0084 | 126  |
| 12-14 Umbrella, 14-16 Scapulae  | 5.1209  | 0.0185 | 56   |
| 12-14 Umbrella, 1-2 Oral arms   | 22.495  | 0.0002 | 62   |
| 12-14 Umbrella, 2-4 Oral arms   | 14.94   | 0.0001 | 7652 |
| 12-14 Umbrella, 4-6 Oral arms   | 10.377  | 0.0004 | 1977 |
| 12-14 Umbrella, 6-8 Oral arms   | 7.9173  | 0.0018 | 462  |
| 12-14 Umbrella, 8-10 Oral arms  | 8.0139  | 0.0087 | 126  |
| 12-14 Umbrella, 10-12 Oral arms | 7.9094  | 0.0064 | 126  |
| 12-14 Umbrella, 12-14 Oral arms | 7.4755  | 0.0081 | 126  |
| 12-14 Umbrella, 14-16 Oral arms | 6.5898  | 0.0165 | 56   |
| 14-16 Umbrella, 1-2 Scapulae    | 1.5196  | 0.1594 | 285  |
| 14-16 Umbrella, 2-4 Scapulae    | 1.0332  | 0.3173 | 1138 |
| 14-16 Umbrella, 4-6 Scapulae    | 4.9907  | 0.0083 | 220  |
| 14-16 Umbrella, 6-8 Scapulae    | 4.8864  | 0.0117 | 84   |
| 14-16 Umbrella, 8-10 Scapulae   | 5.9584  | 0.0309 | 35   |
| 14-16 Umbrella, 10-12 Scapulae  | 6.5633  | 0.0283 | 35   |
| 14-16 Umbrella, 12-14 Scapulae  | 7.1965  | 0.0169 | 56   |
| 14-16 Umbrella, 14-16 Scapulae  | 4.3391  | 0.1031 | 10   |
| 14-16 Umbrella, 1-2 Oral arms   | 20.749  | 0.0032 | 15   |
| 14-16 Umbrella, 2-4 Oral arms   | 12.584  | 0.0013 | 986  |
| 14-16 Umbrella, 4-6 Oral arms   | 9.0568  | 0.0052 | 220  |
| 14-16 Umbrella, 6-8 Oral arms   | 6.86    | 0.0125 | 84   |
| 14-16 Umbrella, 8-10 Oral arms  | 7.3073  | 0.0309 | 35   |
| 14-16 Umbrella, 10-12 Oral arms | 7.2865  | 0.0279 | 35   |
| 14-16 Umbrella, 12-14 Oral arms | 6.554   | 0.0187 | 56   |
| 14-16 Umbrella, 14-16 Oral arms | 5.925   | 0.0935 | 10   |
| 1-2 Scapulae, 2-4 Scapulae      | 2.3498  | 0.0269 | 9832 |
| 1-2 Scapulae, 4-6 Scapulae      | 0.19644 | 0.8481 | 9301 |
| 1-2 Scapulae, 6-8 Scapulae      | 0.10873 | 0.9141 | 5658 |
| 1-2 Scapulae, 8-10 Scapulae     | 0.94532 | 0.369  | 1000 |
| 1-2 Scapulae, 10-12 Scapulae    | 0.71464 | 0.5023 | 953  |
| 1-2 Scapulae, 12-14 Scapulae    | 0.92525 | 0.3795 | 2887 |
| 1-2 Scapulae, 14-16 Scapulae    | 0.88986 | 0.4053 | 285  |
| 1-2 Scapulae, 1-2 Oral arms     | 4.9953  | 0.0001 | 506  |
| 1-2 Scapulae, 2-4 Oral arms     | 4.7888  | 0.0002 | 9792 |
| 1-2 Scapulae, 4-6 Oral arms     | 2.1522  | 0.043  | 9308 |
| 1-2 Scapulae, 6-8 Oral arms     | 1.5517  | 0.1493 | 5686 |
| 1-2 Scapulae, 8-10 Oral arms    | 1.2014  | 0.2666 | 998  |
| 1-2 Scapulae, 10-12 Oral arms   | 1.1024  | 0.2959 | 1001 |
| 1-2 Scapulae, 12-14 Oral arms   | 1.2953  | 0.2254 | 2864 |
| 1-2 Scapulae, 14-16 Oral arms   | 0.95133 | 0.3682 | 286  |
| 2-4 Scapulae, 4-6 Scapulae      | 3.8168  | 0.0011 | 9823 |
| 2-4 Scapulae, 6-8 Scapulae      | 3.7658  | 0.0018 | 9389 |
| 2-4 Scapulae, 8-10 Scapulae     | 5.0756  | 0.0004 | 4812 |
| 2-4 Scapulae, 10-12 Scapulae    | 4.6433  | 0.0004 | 4817 |

|                                |         |        |      |
|--------------------------------|---------|--------|------|
| 2-4 Scapulae, 12-14 Scapulae   | 5.4387  | 0.0002 | 8176 |
| 2-4 Scapulae, 14-16 Scapulae   | 4.4413  | 0.0023 | 1137 |
| 2-4 Scapulae, 1-2 Oral arms    | 16.246  | 0.0001 | 9354 |
| 2-4 Scapulae, 2-4 Oral arms    | 15.457  | 0.0001 | 9835 |
| 2-4 Scapulae, 4-6 Oral arms    | 8.9794  | 0.0001 | 9795 |
| 2-4 Scapulae, 6-8 Oral arms    | 6.8865  | 0.0001 | 9365 |
| 2-4 Scapulae, 8-10 Oral arms   | 5.7461  | 0.0004 | 4833 |
| 2-4 Scapulae, 10-12 Oral arms  | 5.533   | 0.0004 | 4825 |
| 2-4 Scapulae, 12-14 Oral arms  | 6.1206  | 0.0001 | 8167 |
| 2-4 Scapulae, 14-16 Oral arms  | 4.7705  | 0.0016 | 1136 |
| 4-6 Scapulae, 6-8 Scapulae     | 1.0167  | 0.353  | 4281 |
| 4-6 Scapulae, 8-10 Scapulae    | 4.3146  | 0.0014 | 715  |
| 4-6 Scapulae, 10-12 Scapulae   | 4.0126  | 0.0015 | 714  |
| 4-6 Scapulae, 12-14 Scapulae   | 4.7101  | 0.0007 | 1984 |
| 4-6 Scapulae, 14-16 Scapulae   | 3.429   | 0.0189 | 220  |
| 4-6 Scapulae, 1-2 Oral arms    | 23.558  | 0.0001 | 986  |
| 4-6 Scapulae, 2-4 Oral arms    | 13.088  | 0.0001 | 9798 |
| 4-6 Scapulae, 4-6 Oral arms    | 7.7259  | 0.0002 | 8029 |
| 4-6 Scapulae, 6-8 Oral arms    | 5.6601  | 0.0004 | 4308 |
| 4-6 Scapulae, 8-10 Oral arms   | 5.9337  | 0.0014 | 715  |
| 4-6 Scapulae, 10-12 Oral arms  | 5.6491  | 0.0017 | 714  |
| 4-6 Scapulae, 12-14 Oral arms  | 5.212   | 0.0005 | 1986 |
| 4-6 Scapulae, 14-16 Oral arms  | 4.7379  | 0.0045 | 220  |
| 6-8 Scapulae, 8-10 Scapulae    | 3.0926  | 0.0231 | 210  |
| 6-8 Scapulae, 10-12 Scapulae   | 2.8444  | 0.0295 | 210  |
| 6-8 Scapulae, 12-14 Scapulae   | 3.3783  | 0.0117 | 460  |
| 6-8 Scapulae, 14-16 Scapulae   | 2.4006  | 0.0592 | 84   |
| 6-8 Scapulae, 1-2 Oral arms    | 20.898  | 0.0002 | 126  |
| 6-8 Scapulae, 2-4 Oral arms    | 10.118  | 0.0001 | 9247 |
| 6-8 Scapulae, 4-6 Oral arms    | 5.7847  | 0.0007 | 4288 |
| 6-8 Scapulae, 6-8 Oral arms    | 4.1393  | 0.0075 | 462  |
| 6-8 Scapulae, 8-10 Oral arms   | 4.6192  | 0.0085 | 210  |
| 6-8 Scapulae, 10-12 Oral arms  | 4.3772  | 0.0102 | 210  |
| 6-8 Scapulae, 12-14 Oral arms  | 3.8071  | 0.0022 | 462  |
| 6-8 Scapulae, 14-16 Oral arms  | 3.6103  | 0.0098 | 84   |
| 8-10 Scapulae, 10-12 Scapulae  | 1.0086  | 0.3677 | 35   |
| 8-10 Scapulae, 12-14 Scapulae  | 0.52622 | 0.6078 | 126  |
| 8-10 Scapulae, 14-16 Scapulae  | 0.20874 | 0.8591 | 35   |
| 8-10 Scapulae, 1-2 Oral arms   | 13.779  | 0.001  | 31   |
| 8-10 Scapulae, 2-4 Oral arms   | 5.2325  | 0.0006 | 4175 |
| 8-10 Scapulae, 4-6 Oral arms   | 1.7672  | 0.1085 | 714  |
| 8-10 Scapulae, 6-8 Oral arms   | 0.96451 | 0.352  | 210  |
| 8-10 Scapulae, 8-10 Oral arms  | 0.93863 | 0.3721 | 35   |
| 8-10 Scapulae, 10-12 Oral arms | 0.59411 | 0.6323 | 35   |
| 8-10 Scapulae, 12-14 Oral arms | 0.65115 | 0.5535 | 126  |
| 8-10 Scapulae, 14-16 Oral arms | 0.49125 | 0.7151 | 35   |
| 10-12 Scapulae, 12-14 Scapulae | 0.75271 | 0.4318 | 126  |
| 10-12 Scapulae, 14-16 Scapulae | 0.82972 | 0.372  | 35   |
| 10-12 Scapulae, 1-2 Oral arms  | 27.578  | 0.0016 | 31   |
| 10-12 Scapulae, 2-4 Oral arms  | 6.563   | 0.0004 | 4186 |
| 10-12 Scapulae, 4-6 Oral arms  | 3.0459  | 0.0209 | 713  |

|                                  |          |        |      |
|----------------------------------|----------|--------|------|
| 10-12 Scapulae, 6-8 Oral arms    | 1.9274   | 0.0923 | 210  |
| 10-12 Scapulae, 8-10 Oral arms   | 3.142    | 0.0588 | 35   |
| 10-12 Scapulae, 10-12 Oral arms  | 2.9843   | 0.0287 | 35   |
| 10-12 Scapulae, 12-14 Oral arms  | 1.6737   | 0.0866 | 126  |
| 10-12 Scapulae, 14-16 Oral arms  | 2.1475   | 0.1144 | 35   |
| 12-14 Scapulae, 14-16 Scapulae   | 0.59171  | 0.5784 | 56   |
| 12-14 Scapulae, 1-2 Oral arms    | 21.221   | 0.0005 | 62   |
| 12-14 Scapulae, 2-4 Oral arms    | 6.652    | 0.0001 | 7714 |
| 12-14 Scapulae, 4-6 Oral arms    | 2.7164   | 0.0218 | 1981 |
| 12-14 Scapulae, 6-8 Oral arms    | 1.6386   | 0.1353 | 462  |
| 12-14 Scapulae, 8-10 Oral arms   | 2.0508   | 0.0895 | 126  |
| 12-14 Scapulae, 10-12 Oral arms  | 1.6481   | 0.1532 | 126  |
| 12-14 Scapulae, 12-14 Oral arms  | 1.3047   | 0.227  | 126  |
| 12-14 Scapulae, 14-16 Oral arms  | 1.3059   | 0.199  | 56   |
| 14-16 Scapulae, 1-2 Oral arms    | 8.1393   | 0.0034 | 15   |
| 14-16 Scapulae, 2-4 Oral arms    | 3.8717   | 0.0037 | 984  |
| 14-16 Scapulae, 4-6 Oral arms    | 1.0404   | 0.3381 | 220  |
| 14-16 Scapulae, 6-8 Oral arms    | 0.49292  | 0.7297 | 84   |
| 14-16 Scapulae, 8-10 Oral arms   | 0.34589  | 0.8332 | 35   |
| 14-16 Scapulae, 10-12 Oral arms  | 0.118    | 0.9405 | 35   |
| 14-16 Scapulae, 12-14 Oral arms  | 0.24596  | 0.8042 | 56   |
| 14-16 Scapulae, 14-16 Oral arms  | 0.10489  | 1      | 10   |
| 1-2 Oral arms, 2-4 Oral arms     | 4.6254   | 0.0001 | 8626 |
| 1-2 Oral arms, 4-6 Oral arms     | 10.857   | 0.0001 | 993  |
| 1-2 Oral arms, 6-8 Oral arms     | 9.7133   | 0.0001 | 125  |
| 1-2 Oral arms, 8-10 Oral arms    | 16.537   | 0.0009 | 31   |
| 1-2 Oral arms, 10-12 Oral arms   | 19.436   | 0.0009 | 31   |
| 1-2 Oral arms, 12-14 Oral arms   | 11.073   | 0.0002 | 63   |
| 1-2 Oral arms, 14-16 Oral arms   | 15.014   | 0.0031 | 15   |
| 2-4 Oral arms, 4-6 Oral arms     | 4.6665   | 0.0002 | 9805 |
| 2-4 Oral arms, 6-8 Oral arms     | 4.4488   | 0.0001 | 9199 |
| 2-4 Oral arms, 8-10 Oral arms    | 4.4899   | 0.0003 | 4194 |
| 2-4 Oral arms, 10-12 Oral arms   | 4.9373   | 0.0002 | 4170 |
| 2-4 Oral arms, 12-14 Oral arms   | 4.7084   | 0.0007 | 7740 |
| 2-4 Oral arms, 14-16 Oral arms   | 4.2043   | 0.0011 | 986  |
| 4-6 Oral arms, 6-8 Oral arms     | 0.58473  | 0.5772 | 4309 |
| 4-6 Oral arms, 8-10 Oral arms    | 0.92877  | 0.3827 | 707  |
| 4-6 Oral arms, 10-12 Oral arms   | 1.3631   | 0.1962 | 713  |
| 4-6 Oral arms, 12-14 Oral arms   | 0.99893  | 0.3219 | 1981 |
| 4-6 Oral arms, 14-16 Oral arms   | 1.1296   | 0.3037 | 220  |
| 6-8 Oral arms, 8-10 Oral arms    | 0.24922  | 0.8241 | 210  |
| 6-8 Oral arms, 10-12 Oral arms   | 0.58697  | 0.5894 | 210  |
| 6-8 Oral arms, 12-14 Oral arms   | 0.33855  | 0.7463 | 462  |
| 6-8 Oral arms, 14-16 Oral arms   | 0.4772   | 0.6874 | 84   |
| 8-10 Oral arms, 10-12 Oral arms  | 0.55439  | 0.6012 | 35   |
| 8-10 Oral arms, 12-14 Oral arms  | 0.1195   | 0.9247 | 126  |
| 8-10 Oral arms, 14-16 Oral arms  | 0.40624  | 0.534  | 35   |
| 10-12 Oral arms, 12-14 Oral arms | 0.23102  | 0.8729 | 126  |
| 10-12 Oral arms, 14-16 Oral arms | 0.021272 | 0.9711 | 35   |
| 12-14 Oral arms, 14-16 Oral arms | 0.17698  | 0.9079 | 56   |
